# Supplementary material for: Long Noncoding RNA NEAT1 Regulates TGF‐β2‐Induced Epithelial‐Mesenchymal Transition of Lens Epithelial Cells through the miR‐34a/Snail1 and miR‐204/Zeb1 Pathways
Source: Hindawi journal article supplement (doi:10.1155/2020/8352579), 2020-01-01
Supplement: f1 [file 8352579.f1.pdf]

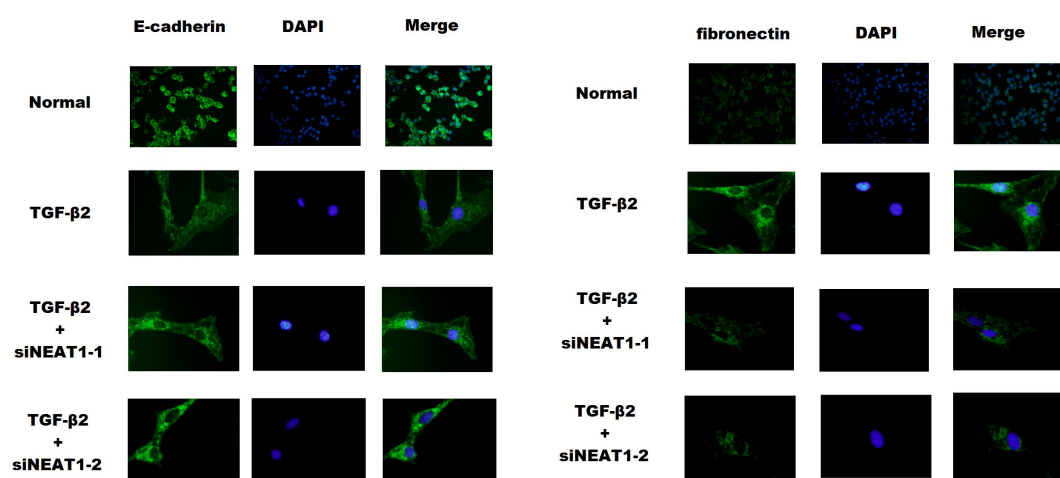

Supplementary Figure S1: TGF- $\beta$ 2 induces down-regulation of E-cadherin and up-regulation of fibronectin in primary HLECs through a NEAT1-dependent mechanism. Immunocytofluorescence showed that the expression of E-cadherin (green) and fibronectin (green) and the morphology of primary HLECs. The primary HLECs were treated with TGF- $\beta$ 2 (5 ng/ml) for 48 h before incubation with 100 nM siNEAT1-1 or siNEAT1-2 for 24 h.
